# Supplementary material
Source: publisher figshare collection journal article supplement (https://gsajournals.figshare.com/articles/dataset/_/13273286)
Supplement: Supplementary file 1 [file 1]

## List of Supplemental Materials for Hickey et al. (2020)\_*Genetics*

“Protein Quality Control Degron-containing Substrates are Differentially Targeted in the  
Cytoplasm and Nucleus by Ubiquitin Ligases”

\*All supplemental materials except Supplemental Table 5 are within this single PDF.

### Supplemental Figures:

Supplemental Figure 1. Supports Figure 1

Supplemental Figure 2. Supports Figure 1

Supplemental Figure 3. Supports Figure 2

Supplemental Figure 4. Supports Figure 9

Supplemental Figure 5. Supports Figure 11

### Supplemental Tables:

Supplemental Table 1. Plasmids used in this study

Supplemental Table 2. Yeast strains used in this study

Supplemental Table 3. Targeted Ubiquitin System, version 2.1 (TUS2.1)

Supplemental Table 4. Targeted Ubiquitin System, version 2.0 (TUS2.0)

Supplemental Table 5. Excel file with raw data on human C-terminal 23-mers

## Supplemental Figure Legends

**Supplemental Figure 1.** A screen for ubiquitylation machinery involved in targeting the *Deg2* degron revealed potential roles for Ubr1 and Dia2. (A) An updated targeted ubiquitin system (TUS) yeast gene deletion collection was compiled to identify specific ubiquitylation pathways in *Saccharomyces cerevisiae*. Each well of the 96-well plate contains a haploid yeast strain lacking the coding sequence of a single gene. See Supplemental Table 3 for organization of the strains in the plate. (B) Listed in this table are the TUS2.0 strains that grew better than a control strain (*trp1Δ*) on media lacking uracil in the primary YUMI screen. Growth scores are relative to one another and +++ growth was slower than expected for a strain with maximal Ura3 fusion protein stabilization. (C) Image and key for a single plate from the primary screen. This plate shows better growth of the *dia2Δ* strain than any other strains in column 10 of the TUS2.0.

**Supplemental Figure 2.** Combining deletion of *SLX8* with deletion of either *UBR1* or *DIA2* leads to robust growth based on the *Deg2*-Ura3-3HA reporter. (A) Schematic for mating-based generation of haploids lacking *SLX8* plus another gene and also carrying the *Deg2* reporter for testing by growth assay. (B) Growth assays for select strains in which each strain lacked the *SLX8* gene in addition to a gene identified in the original screen, as indicated. Genes deleted that are not listed in Supplemental Figure 1 were those whose enhanced growth (compared to the control strain) in the primary screen was questionable. An apparent slightly better growth for any strain in the primary screen could have been due to a relatively heavy streak of the yeast by Christopher Hickey. Relatively slow growth of the *slx8Δ doa4Δ* strain compared to either the *slx8Δ ubr1Δ* or *slx8Δ dia2Δ* strain suggests that combining loss of the Slx5/Slx8 activity with general defects in

ubiquitin homeostasis (also known to be a phenotype of *doa1Δ* or *ubx1Δ* strains) does not lead to additive effects on the stabilization of the *Deg2* reporter.

**Supplemental Figure 3.** Additional data on degradation of MATa1 and degrons derived from MATa1. (A) The N-terminal half of MATa1 is not stabilized in cells lacking Doa10. Immunoblot data following cycloheximide-chase in MHY500 (*WT*) or MHY1685 (*doa10Δ*) cells carrying a plasmid expressing the MATa1(1-68)-Ura3-3HA protein. (B) MATa1-Ura3-3HA is targeted by Ubr1 and an E3 or E3s operating with Ubc4/Ubc5. Immunoblot data following cycloheximide-chase in MHY500 (*WT*), MHY9550 (*ubc4Δ ubc5Δ ubr1Δ* + UBC4), MHY9552 (*ubc4Δ ubc5Δ* + *ubc4-N78S*), or MHY9554 (*ubc4Δ ubc5Δ ubr1Δ* + *ubc4-N78S*) cells carrying a plasmid expressing the MATa1-Ura3-3HA protein.

**Supplemental Figure 4.** Comparing the reporter proteins made in the current study terminating with VVLVVVF with the reporter protein from Maurer et al. also terminating in VVLVVVF and called “10-34”. (A) Amino acid sequence shown is that following the matched NLS- and m.nls-reporter proteins in the current study, as described in Figure 4. Growth assays on media lacking either leucine or uracil for the indicated strains expressing the indicated reporter protein. (B) Amino acid sequence shown is that following the Ura3 protein in the Ura3-10-34 degron reporter from Maurer et al. In red are the 3 HA epitopes. Any of the amino acids upstream of VVLVVVF could contribute to overall degron function. Growth assays on media lacking either leucine or uracil for the indicated strains expressing the original Ura3-10-34 protein. Strains used in this figure are BY4741 (*WT*), MHY7665 (*ubr1Δ*), MHY11286 (*san1Δ*), and MHY6780 (*ltn1Δ*).

**Supplemental Figure 5.** Additional figures for bioinformatic analysis of the human C-terminal 23-mers from human proteins that were fused to GFP in Koren et al. (A) There is little correlation between theoretical isoelectric point of the 23 amino acid peptides and the protein stability index (PSI) determined for the corresponding GFP-23mer. (B) Displayed are the percentages of peptides that end in the indicated amino acid (single letter code) in three peptide sets: [1] the entire collection of 16,345 peptides, [2] a set of peptides that yielded PSI scores of 1.5 or lower and had relatively low hydrophobicity, and [3] a set of peptides that yielded PSI scores less than 2 and had very low hydrophobicity. A dashed line at 5% represents the theoretical percentage if each of the 20 amino acids were used equally. See Supplemental Table 5 for all data on hydrophobicity.

A.

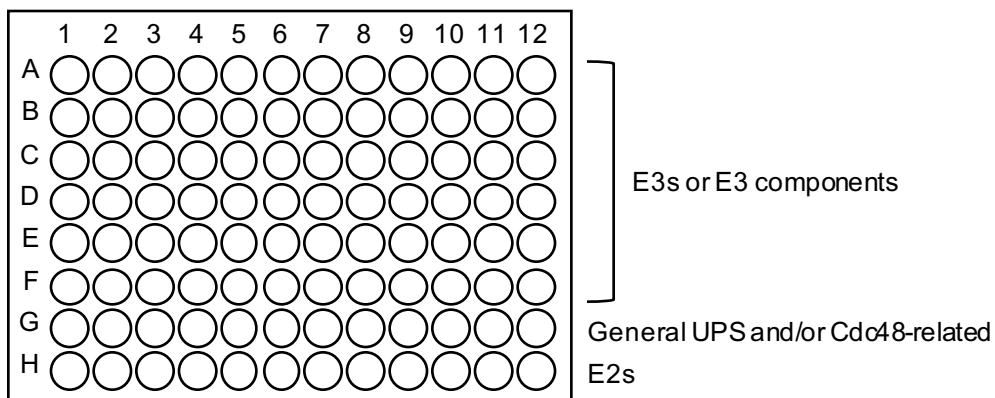

B.

| <u>Well</u> | <u>Gene deleted</u> | <u>Growth Score</u> | <u>Comments</u>                                     |
|-------------|---------------------|---------------------|-----------------------------------------------------|
| A9          | <i>SLX5</i>         | +                   | Slx5/8 is known E3 for <i>Deg2</i> and $MAT\alpha2$ |
| C1          | <i>SLX8</i>         | ++                  | Slx5/8 is known E3 for <i>Deg2</i> and $MAT\alpha2$ |
| C6          | <i>UBR1</i>         | ++                  | E3 for the N-end pathway and PQC                    |
| F10         | <i>DIA2</i>         | +++                 | Known to affect transcription generally             |
| G5          | <i>DOA4</i>         | ++                  | DUB; deletion affects UPS generally                 |
| G6          | <i>UBX1</i>         | ++                  | Deletion affects UPS generally                      |
| H1          | <i>DOA1</i>         | +++                 | Deletion affects UPS generally                      |
| H2          | <i>UBC2</i>         | ++                  | E2; operates with the E3 Ubr1                       |
| H3          | <i>UBC4</i>         | ++                  | E2; known E2 for <i>Deg2</i> and $MAT\alpha2$       |

C.

TUS2.0, column 10

- A. *bre1* $\Delta$
- B. *tom1* $\Delta$
- C. *fyv10* $\Delta$
- D. No prey strain
- E. *asi1* $\Delta$
- F. *dia2* $\Delta$
- G. *ubx5* $\Delta$
- H. *ubc12* $\Delta$

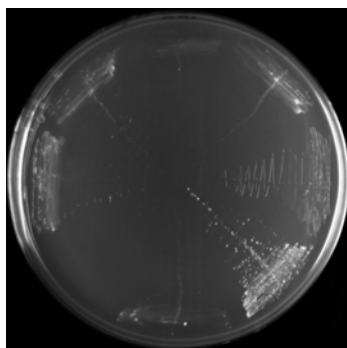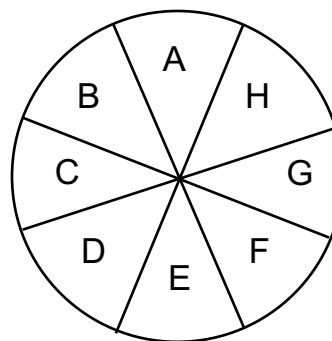

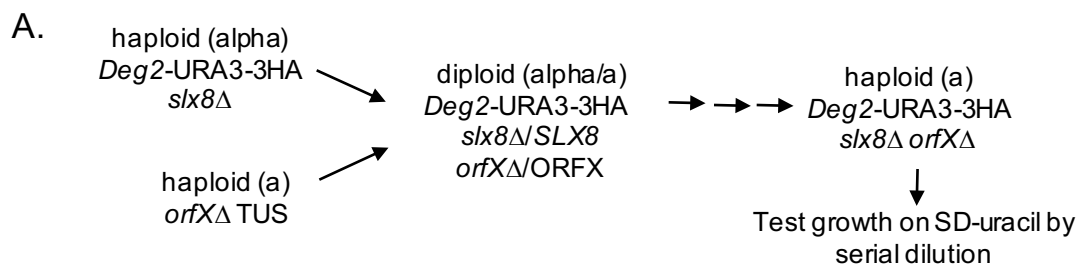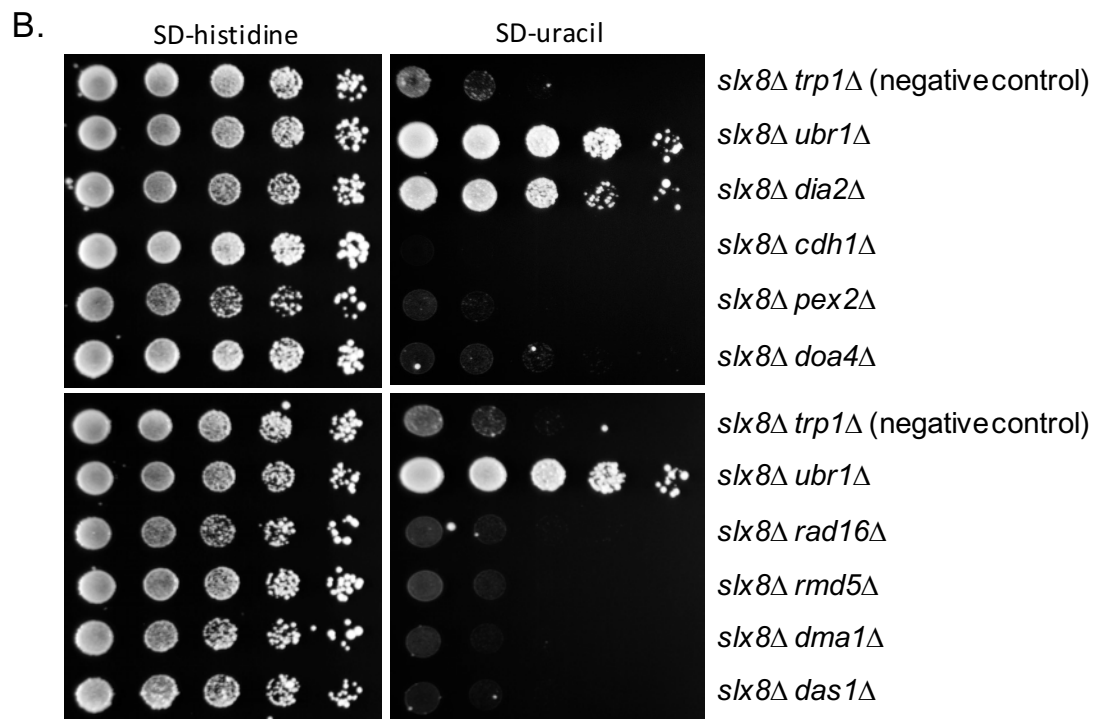

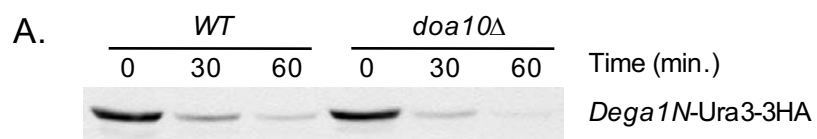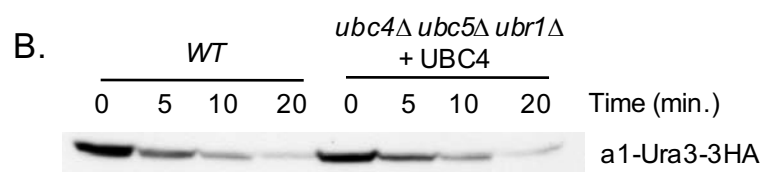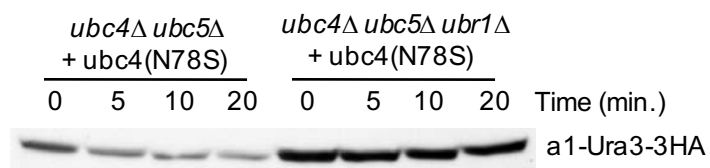





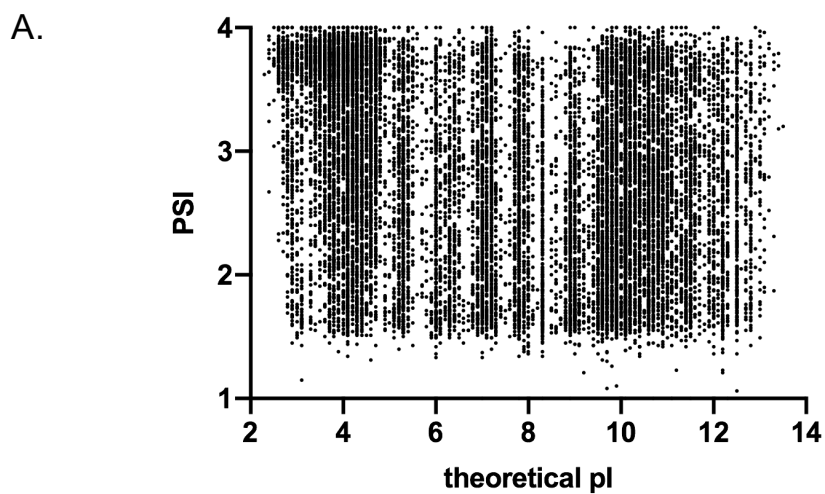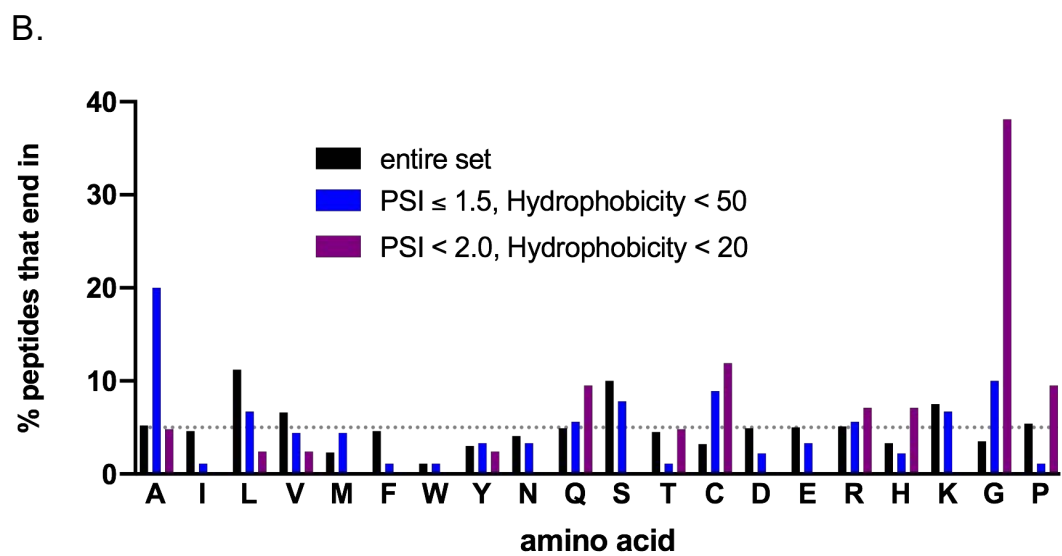

**Supplemental Table 1. Plasmids used in this study.**

| <b>Plasmid</b>                                                | <b>Source</b>       |
|---------------------------------------------------------------|---------------------|
| p415MET25promoter- $\alpha$ 2(103-189)-URA3-3HA-6His          | Hickey et al., 2015 |
| p414MET25promoter- $\alpha$ 2(103-189)-URA3-3HA-6His          | Hickey et al., 2015 |
| pAG32-MET25promoter- $\alpha$ 2(103-189)-URA3-3HA-6His-CYC1TT | This study          |
| p415MET25promoter-a1(cDNA)-URA3-3HA-6His                      | This study          |
| p415TEF1promoter-a1(cDNA)-URA3-3HA-6His                       | This study          |
| p415MET25promoter-a1(cDNA; 1-68; Y34Y)-URA3-3HA-6His          | This study          |
| p415MET25promoter-a1(cDNA; 69-126)-URA3-3HA-6His              | This study          |
| p414MET25promoter-a1(cDNA; 69-126)-URA3-3HA-6His              | This study          |
| pRS306-UBC4promoter-UBC4                                      | Stoll et al., 2011  |
| pRS306-UBC4promoter-UBC4(N78S)                                | Stoll et al., 2011  |
| p415MET25promoter-URA3-HA-MCS                                 | This study          |
| p415MET25promoter-URA3-HA-a1(20-40)                           | This study          |
| p415MET25promoter-URA3-HA-DegOOF                              | This study          |
| pRS313-RFP-PUS1                                               | Han et al., 2007    |
| p415MET25promoter-NLS-GFP-URA3-HA-MCS                         | This study          |
| p415MET25promoter-mutant.nls-GFP-URA3-HA-MCS                  | This study          |
| p415MET25promoter-NLS-GFP-URA3-HA-STOP                        | This study          |
| p415MET25promoter-mutant.nls-GFP-URA3-HA-STOP                 | This study          |
| p415MET25promoter-NLS-GFP-URA3-HA-DegOOF                      | This study          |
| p415MET25promoter-mutant.nls-GFP-URA3-HA-DegOOF               | This study          |
| p415MET25promoter-NLS-GFP-URA3-HA-CL1                         | This study          |
| p415MET25promoter-mutant.nls-GFP-URA3-HA-CL1                  | This study          |
| p415MET25promoter-NLS-GFP-URA3-HA-DegF7H                      | This study          |
| p415MET25promoter-mutant.nls-GFP-URA3-DegF7H                  | This study          |
| p415MET25promoter-NLS-GFP-URA3-HA-pentaV                      | This study          |
| p415MET25promoter-mutant.nls-GFP-URA3-pentaV                  | This study          |
| p415MET25promoter-NLS-GFP-URA3-HA-VVLVVVF                     | This study          |
| p415MET25promoter-mutant.nls-GFP-URA3-HA-VVLVVVF              | This study          |
| pSM2720 = p415MET25promoter-URA3-3HA-“10-34”                  | Maurer et al., 2016 |
| pcDNA5-FRT/TO-NLS-eGFP-HA-MCS                                 | This study          |
| pcDNA5-FRT/TO-mutant.nls-eGFP-HA-MCS                          | This study          |
| pcDNA5-FRT/TO-NLS-eGFP-HA-STOP                                | This study          |
| pcDNA5-FRT/TO-mutant.nls-eGFP-HA-STOP                         | This study          |
| pcDNA5-FRT/TO-NLS-eGFP-HA-DegF7H                              | This study          |
| pcDNA5-FRT/TO-mutant.nls-eGFP-HA-DegF7H                       | This study          |

Notes: HA = epitope tag; TT = transcriptional terminator; MCS = multiple cloning site; NLS = nuclear localization signal; STOP = stop codon.

**Supplemental Table 2. Yeast strains used in this study.**

| <b>Strain</b> | <b>Genotype</b>                                                                                                                                                                                                                                      | <b>Source</b>          |
|---------------|------------------------------------------------------------------------------------------------------------------------------------------------------------------------------------------------------------------------------------------------------|------------------------|
| MHY2994       | <i>MAT<math>\alpha</math> his3<math>\Delta</math>1 leu2<math>\Delta</math>0, met15<math>\Delta</math>0, ura3<math>\Delta</math>0 lyp1<math>\Delta</math> can1<math>\Delta</math>:MFA1pr-HIS3</i>                                                     | Tong et al., 2001.     |
| MHY9368       | <i>MAT<math>\alpha</math> his3<math>\Delta</math>1 leu2<math>\Delta</math>0, met15<math>\Delta</math>0, ura3<math>\Delta</math>0 lyp1<math>\Delta</math> can1<math>\Delta</math>:MFA1pr-HIS3 Deg2-Ura3-3HA::hphMX</i>                                | This study             |
| MHY9369       | <i>MAT<math>\alpha</math> his3<math>\Delta</math>1 leu2<math>\Delta</math>0, met15<math>\Delta</math>0, ura3<math>\Delta</math>0 lyp1<math>\Delta</math> can1<math>\Delta</math>:MFA1pr-HIS3 slx8<math>\Delta</math>::natMX Deg2-Ura3-3HA::hphMX</i> | This study             |
| MHY501        | <i>MAT<math>\alpha</math> his3-<math>\Delta</math>200 leu2-3,112 ura3-52 lys2-801 trp1-1</i>                                                                                                                                                         | Chen et al., 1993      |
| MHY500        | <i>MAT<math>\alpha</math> his3-<math>\Delta</math>200 leu2-3,112 ura3-52 lys2-801 trp1-1</i>                                                                                                                                                         | Chen et al., 1993      |
| MHY606        | Diploid equivalent of MHY500 and MHY501                                                                                                                                                                                                              | Chen et al., 1993      |
| MHY3716       | <i>MAT<math>\alpha</math> his3-<math>\Delta</math>200 leu2-3,112 ura3-52 lys2-801 trp1-1 slx8<math>\Delta</math>::kanMX4</i>                                                                                                                         | Xie et al., 2010       |
| MHY474        | <i>MAT<math>\alpha</math> his3-<math>\Delta</math>200 leu2-3,112 ura3-52 lys2-801 trp1-1 ubr1<math>\Delta</math>::LEU2</i>                                                                                                                           | Bartel et al., 1990    |
| MHY9394       | <i>MAT<math>\alpha</math> his3-<math>\Delta</math>200 leu2-3,112 ura3-52 lys2-801 trp1-1 ubr1<math>\Delta</math>::LEU2 slx8<math>\Delta</math>::kanMX4</i>                                                                                           | This study             |
| MHY3718       | <i>MAT<math>\alpha</math> his3-<math>\Delta</math>200 leu2-3,112 ura3-52 lys2-801 trp1-1 slx8<math>\Delta</math>::kanMX4 doa10<math>\Delta</math>::HIS3</i>                                                                                          | Xie et al., 2010       |
| MHY9396       | <i>MAT<math>\alpha</math> his3-<math>\Delta</math>200 leu2-3,112 ura3-52 lys2-801 trp1-1 slx8<math>\Delta</math>::kanMX4 doa10<math>\Delta</math>::HIS3 ubr1<math>\Delta</math>::LEU2</i>                                                            | This study             |
| MHY2836       | <i>MAT<math>\alpha</math> his3-<math>\Delta</math>200 leu2-<math>\Delta</math>1 ura3-52 lys2-801 trp1-<math>\Delta</math>63 ade2-101</i>                                                                                                             | Ghislain et al., 1993  |
| MHY4464       | <i>MAT<math>\alpha</math> his3-<math>\Delta</math>200 leu2-<math>\Delta</math>1 ura3-52 lys2-801 trp1-<math>\Delta</math>63 ade2-101 cim3-1</i>                                                                                                      | Ghislain et al., 1993  |
| MHY9380       | <i>MAT<math>\alpha</math> his3-<math>\Delta</math>200 leu2-3,112 ura3-52 lys2-801 trp1-1 ubr1<math>\Delta</math>::LEU2</i>                                                                                                                           | This study             |
| MHY513        | <i>MAT<math>\alpha</math> his3-<math>\Delta</math>200 leu2-3,112 ura3-52 lys2-801 trp1-1 ubc4<math>\Delta</math>::HIS3</i>                                                                                                                           | Chen et al., 1993      |
| MHY9496       | <i>MAT<math>\alpha</math> his3-<math>\Delta</math>200 leu2-3,112 ura3-52 lys2-801 trp1-1 ubr1<math>\Delta</math>::LEU2 ubc4<math>\Delta</math>::HIS3</i>                                                                                             | This study             |
| MHY9384       | <i>MAT<math>\alpha</math> his3-<math>\Delta</math>200 leu2-3,112 ura3-52 lys2-801 trp1-1 ubr1<math>\Delta</math>::LEU2 ubc4<math>\Delta</math>::HIS3 doa10<math>\Delta</math>::HIS3</i>                                                              | This study             |
| BY4741        | <i>MAT<math>\alpha</math> his3<math>\Delta</math>1 leu2<math>\Delta</math>0, met15<math>\Delta</math>0, ura3<math>\Delta</math>0</i>                                                                                                                 | Brachmann et al., 1998 |
| MHY7665       | <i>MAT<math>\alpha</math> his3<math>\Delta</math>1 leu2<math>\Delta</math>0, met15<math>\Delta</math>0, ura3<math>\Delta</math>0 ubr1<math>\Delta</math>::kanMX4</i>                                                                                 | Deletion library       |
| MHY1685       | <i>MAT<math>\alpha</math> his3-<math>\Delta</math>200 leu2-3,112 ura3-52 lys2-801 trp1-1 doa10<math>\Delta</math>::HIS3</i>                                                                                                                          | Swanson et al., 2001   |

|         |                                                                                                                             |                       |
|---------|-----------------------------------------------------------------------------------------------------------------------------|-----------------------|
| MHY9550 | <i>MATa his3-Δ200 leu2-3,112 ura3-52 lys2-801 trp1-1 ubc4Δ::HIS3 ubc5Δ::LEU2 ubr1Δ::natMX pRS306-UBC4 (integrated)</i>      | This study            |
| MHY9552 | <i>MATa his3-Δ200 leu2-3,112 ura3-52 lys2-801 trp1-1 ubc4Δ::HIS3 ubc5Δ::LEU2 pRS306-ubc4-N78S (integrated)</i>              | This study            |
| MHY9554 | <i>MATa his3-Δ200 leu2-3,112 ura3-52 lys2-801 trp1-1 ubc4Δ::HIS3 ubc5Δ::LEU2 ubr1Δ::natMX pRS306-ubc4-N78S (integrated)</i> | This study            |
| MHY4995 | <i>MATa ade2-1 his3-11,15 leu2-3,112 ura3-1 trp1-1 can1-100 pRS313-UBA1</i>                                                 | Ghaboosi et al., 2007 |
| MHY4996 | <i>MATa ade2-1 his3-11,15 leu2-3,112 ura3-1 trp1-1 can1-100 pRS313-uba1-204</i>                                             | Ghaboosi et al., 2007 |
| MHY6197 | <i>MATα his3-Δ200 leu2-3,112 ura3-52 lys2-801 trp1-1 doa10Δ::hphMX4</i>                                                     | This study            |
| MHY6199 | <i>MATα his3-Δ200 leu2-3,112 ura3-52 lys2-801 trp1-1 hrd1Δ::kanMX4</i>                                                      | This study            |
| MHY6194 | <i>MATα his3-Δ200 leu2-3,112 ura3-52 lys2-801 trp1-1 hrd1Δ::kanMX4 doa10Δ::hphMX4</i>                                       | This study            |
| MHY8940 | <i>MATα his3-Δ200 leu2-3,112 ura3-52 lys2-801 trp1-1 asi1Δ::kanMX6</i>                                                      | This study            |
| MHY8949 | <i>MATα his3-Δ200 leu2-3,112 ura3-52 lys2-801 trp1-1 asi1Δ::hphMX doa10Δ::HIS3</i>                                          | This study            |
| MHY1631 | <i>MATα his3-Δ200 leu2-3,112 ura3-52 lys2-801 trp1-1 doa10Δ::HIS3</i>                                                       | Swanson et al., 2001  |
| MHY9532 | <i>MATα his3-Δ200 leu2-3,112 ura3-52 lys2-801 trp1-1 ubr1Δ::natMX</i>                                                       | This study            |
| MHY3178 | <i>MATα his3-Δ200 leu2-3,112 ura3-52 lys2-801 trp1-1 san1Δ::kanMX</i>                                                       | This study            |
| MHY9564 | <i>MATα his3-Δ200 leu2-3,112 ura3-52 lys2-801 trp1-1 ubr1Δ::natMX doa10Δ::HIS3</i>                                          | This study            |
| MHY3208 | <i>MATα his3-Δ200 leu2-3,112 ura3-52 lys2-801 trp1-1 san1Δ::kanMX doa10Δ::HIS3</i>                                          | This study            |
| MHY9563 | <i>MATα his3-Δ200 leu2-3,112 ura3-52 lys2-801 trp1-1 san1Δ::kanMX ubr1Δ::natMX</i>                                          | This study            |
| MHY9567 | <i>MATα his3-Δ200 leu2-3,112 ura3-52 lys2-801 trp1-1 san1Δ::kanMX ubr1Δ::natMX doa10Δ::HIS3</i>                             | This study            |
| MHY6780 | <i>MATa his3Δ1 leu2Δ0, met15Δ0, ura3Δ0 ltn1Δ::kanMX4</i>                                                                    | Deletion library      |

**Hickey et al. *Genetics* Supplemental Table 3**

Targeted Ubiquitin System (TUS) library, version 2.1

all strains are mating type a

the background (wild type) strain is called BY4741 = his3 $\Delta$ 1 leu2 $\Delta$ 0 ura3 $\Delta$ 0 met15 $\Delta$ 0

| <u>POSITION</u> | <u>ORF</u>   | <u>NAME</u>  | <u>Motif</u>      | <u>Notes</u>            |
|-----------------|--------------|--------------|-------------------|-------------------------|
| A1              | YAL002W      | VPS8         | RING              |                         |
| A2              | YBL104C      | SEA4         | RING              |                         |
| A3              | YBR062C      | YBR062C      | RING              |                         |
| A4              | YBR114W      | RAD16        | RING              |                         |
| A5              | YBR158W      | AMN1         | F box             |                         |
| A6              | YBR203W      | COS111       | F box             |                         |
| A7              | YBR280C      | SAF1         | F box             |                         |
| A8              | YCR066W      | RAD18        | RING              |                         |
| A9              | YDL013W      | SLX5         | RING              |                         |
| A10             | YDL074C      | BRE1         | RING              |                         |
| A11             | YDL190C      | UFD2         | U-box             |                         |
| A12             | YDR049W      | VMS1         | zinc finger, C2H2 | peptidyl-RNA hydrolase  |
| B1              | YDR103W      | STE5         | unlikely an E3    | mating deficient strain |
| B2              | YDR131C      | YDR131C      | F box             |                         |
| B3              | YDR143C      | SAN1         | RING              |                         |
| B4              | YDR219C      | MFB1         | F box             |                         |
| B5              | YDR255C      | RMD5         | RING              |                         |
| B6              | YDR265W      | PEX10        | RING              |                         |
| B7              | YDR266C      | HEL2         | RING              |                         |
| B8              | YDR306C      | PFU1         | F box             |                         |
| B9              | YDR313C      | PIB1         | RING              |                         |
| B10             | YDR457W      | TOM1         | HECT              |                         |
| B11             | <i>empty</i> | <i>empty</i> | <i>empty</i>      |                         |
| B12             | YER068W      | MOT2/NOT4    | RING              |                         |
| C1              | YER116C      | SLX8         | RING              |                         |
| C2              | YGL003C      | CDH1         | APC/C activator   |                         |
| C3              | YGL131C      | SNT2         | RING              |                         |
| C4              | YGL141W      | HUL5         | HECT              |                         |
| C5              | YGR003W      | CUL3         | CULLIN            |                         |
| C6              | YGR184C      | UBR1         | RING              |                         |
| C7              | YHL010C      | ETP1         | RING              |                         |
| C8              | YHR115C      | DMA1         | RING              |                         |
| C9              | YIL030C      | SSM4/DOA10   | RING              |                         |
| C10             | YIL097W      | FYV10        | degenerate RING   | strain incorrect?       |
| C11             | YJL047C      | RTT101       | CULLIN            |                         |
| C12             | YJL149W      | DAS1         | F box             |                         |
| D1              | YJL157C      | FAR1         | RING              |                         |
| D2              | YJL204C      | RCY1         | F box             |                         |
| D3              | YJL210W      | PEX2         | RING              |                         |
| D4              | YJR036C      | HUL4         | HECT              |                         |
| D5              | YJR052W      | RAD7         | F box             |                         |
| D6              | YJR090C      | GRR1         | F box             | slow growth; flocculant |

|     |         |            |                               |                |
|-----|---------|------------|-------------------------------|----------------|
| D7  | YKL010C | UFD4       | HECT                          |                |
| D8  | YKL034W | TUL1       | RING                          |                |
| D9  | YKR017C | HEL1       | RING                          |                |
| D10 | YLR024C | UBR2       | RING                          | made by Hickey |
| D11 | YLR032W | RAD5       | RING                          |                |
| D12 | YLR097C | HRT3       | F box                         |                |
| E1  | YLR148W | PEP3/VPS18 | RING                          |                |
| E2  | YLR224W | UCC1       | F box                         |                |
| E3  | YLR247C | IRC20      | RING                          |                |
| E4  | YLR352W | LUG1       | F box                         |                |
| E5  | YLR368W | MDM30      | F box                         |                |
| E6  | YLR427W | MAG2       | RING                          |                |
| E7  | YML068W | ITT1       | RING                          |                |
| E8  | YML088W | UFO1       | F box                         | slow growth    |
| E9  | YMR026C | PEX12      | RING                          |                |
| E10 | YMR119W | ASI1       | RING                          |                |
| E11 | YMR231W | PEP5/VPS11 | RING                          |                |
| E12 | YMR247C | RKR1/LTN1  | RING                          |                |
| F1  | YMR258C | ROY1       | F box                         |                |
| F2  | YNL008C | ASI3       | RING                          |                |
| F3  | YNL023C | FAP1       | RING                          |                |
| F4  | YNL116W | DMA2       | RING                          |                |
| F5  | YNL230C | ELA1       | F box                         |                |
| F6  | YNL311C | SKP2       | F box                         |                |
| F7  | YOL013C | HRD1       | RING                          |                |
| F8  | YOL054W | PSH1       | RING                          |                |
| F9  | YOL138C | RTC1       | RING                          |                |
| F10 | YOR080W | DIA2       | F box                         |                |
| F11 | YOR191W | ULS1       | RING                          |                |
| F12 | YPR093C | ASR1       | RING                          |                |
| G1  | YDR069C | DOA4       | deubiquitylase                | slow growth    |
| G2  | YGR135W | PRE9       | proteasome subunit $\alpha$ 3 | slow growth    |
| G3  | YDL020C | RPN4       | transcription factor          |                |
| G4  | YKL213C | DOA1       | UPS- and Cdc48-related        | slow growth    |
| G5  | YNL155W | CUZ1       | UPS- and Cdc48-related        |                |
| G6  | YBL058W | SHP1/UBX1  | UBX domain                    | slow growth    |
| G7  | YML013W | UBX2       | UBX domain                    |                |
| G8  | YDL091C | UBX3       | UBX domain                    |                |
| G9  | YMR067C | UBX4       | UBX domain                    |                |
| G10 | YDR330W | UBX5       | UBX domain                    |                |
| G11 | YJL048C | UBX6       | UBX domain                    |                |
| G12 | YBR273C | UBX7       | UBX domain                    |                |
| H1  | YDR177W | UBC1       | E2                            | slow growth    |
| H2  | YGL058W | UBC2       | E2                            | slow growth    |
| H3  | YBR082C | UBC4       | E2                            |                |
| H4  | YDR059C | UBC5       | E2                            |                |
| H5  | YER100W | UBC6       | E2                            | made by Hickey |
| H6  | YMR022W | UBC7       | E2                            |                |
| H7  | YEL012W | UBC8       | E2                            |                |

|     |         |       |                     |
|-----|---------|-------|---------------------|
| H8  | YGR133W | UBC10 | E2                  |
| H9  | YOR339C | UBC11 | E2                  |
| H10 | YLR306W | UBC12 | E2                  |
| H11 | YDR092W | UBC13 | E2                  |
| H12 | YOR153W | PDR5  | "Wild Type" for UPS |

**KEY:**

Yellow = known or likely E3s, or parts of E3 complexes.

Green = General UPS and/or Cdc48-associated factors

Blue = ubiquitin-conjugating enzymes (E2s)

E2 and E3 genes NOT covered by TUS2.1 (deletion is inviable, unless noted)

| <b>ORF</b> | <b>NAME</b> | <b>Motif</b>     | <b>Notes</b>           |
|------------|-------------|------------------|------------------------|
| YER125W    | RSP5        | HECT             |                        |
| YLL036C    | PRP19       | U-box            |                        |
| YGL116W    | CDC20       | APC/C activator  |                        |
| YDL008W    | APC11       | RING             | APC/C RING protein     |
| YOL133W    | HRT1        | RING             | RING for SCFs          |
| YDR460W    | TFB3        | RING             |                        |
| YLR323C    | CWC24       | RING             | spliceosome            |
| YDR328C    | SKP1        | SCF Skp1 subunit |                        |
| YDL132W    | CDC53       | Cullin           |                        |
| YFL009W    | CDC4        | F box            |                        |
| YIL046W    | MET30       | F box            |                        |
| YMR094W    | CTF13       | F box            |                        |
| YPL046C    | ELC1        | Elongin C        | the deletion is viable |
| YDR054C    | UBC3/CDC34  | E2               | E2 for SCFs            |

**Hickey et al. *Genetics* Supplemental Table 4**

Targeted Ubiquitin System (TUS) library, version 2.0

all strains are mating type a

the background (wild type) strain is called BY4741 = his3 $\Delta$ 1 leu2 $\Delta$ 0 ura3 $\Delta$ 0 met15 $\Delta$ 0

| <u>POSITION</u> | <u>ORF</u>   | <u>NAME</u>  | <u>Motif</u>      | <u>Notes</u>            |
|-----------------|--------------|--------------|-------------------|-------------------------|
| A1              | YAL002W      | VPS8         | RING              |                         |
| A2              | YBL104C      | SEA4         | RING              |                         |
| A3              | YBR062C      | YBR062C      | RING              |                         |
| A4              | YBR114W      | RAD16        | RING              |                         |
| A5              | YBR158W      | AMN1         | F box             |                         |
| A6              | YBR203W      | COS111       | F box             |                         |
| A7              | YBR280C      | SAF1         | F box             |                         |
| A8              | YCR066W      | RAD18        | RING              |                         |
| A9              | YDL013W      | SLX5         | RING              |                         |
| A10             | YDL074C      | BRE1         | RING              |                         |
| A11             | YDL190C      | UFD2         | U-box             |                         |
| A12             | YDR049W      | VMS1         | zinc finger, C2H2 | peptidyl-RNA hydrolase  |
| B1              | YDR103W      | STE5         | RING-like         | mating deficient strain |
| B2              | YDR131C      | YDR131C      | F box             |                         |
| B3              | YDR143C      | SAN1         | RING              |                         |
| B4              | YDR219C      | MFB1         | F box             |                         |
| B5              | YDR255C      | RMD5         | RING              |                         |
| B6              | YDR265W      | PEX10        | RING              |                         |
| B7              | YDR266C      | HEL2         | RING              |                         |
| B8              | YDR306C      | PFU1         | F box             |                         |
| B9              | YDR313C      | PIB1         | RING              |                         |
| B10             | YDR457W      | TOM1         | HECT              |                         |
| B11             | <i>empty</i> | <i>empty</i> | <i>empty</i>      |                         |
| B12             | YER068W      | MOT2/NOT4    | RING              |                         |
| C1              | YER116C      | SLX8         | RING              |                         |
| C2              | YGL003C      | CDH1         | APC/C activator   |                         |
| C3              | YGL131C      | SNT2         | RING              |                         |
| C4              | YGL141W      | HUL5         | HECT              |                         |
| C5              | YGR003W      | CUL3         | Cullin            |                         |
| C6              | YGR184C      | UBR1         | RING              |                         |
| C7              | YHL010C      | ETP1         | RING              |                         |
| C8              | YHR115C      | DMA1         | RING              |                         |
| C9              | YIL030C      | SSM4/DOA10   | RING              |                         |
| C10             | YIL097W      | FYV10        | degenerate RING   | strain incorrect?       |
| C11             | YJL047C      | RTT101       | Cullin            |                         |
| C12             | YJL149W      | DAS1         | F box             |                         |
| D1              | YJL157C      | FAR1         | RING              |                         |
| D2              | YJL204C      | RCY1         | F box             |                         |
| D3              | YJL210W      | PEX2         | RING              |                         |
| D4              | YJR036C      | HUL4         | HECT              |                         |
| D5              | YJR052W      | RAD7         | F box             |                         |
| D6              | YJR090C      | GRR1         | F box             | slow growth; flocculant |



|     |                                      |              |                       |             |
|-----|--------------------------------------|--------------|-----------------------|-------------|
| D7  | YKL010C                              | UFD4         | HECT                  |             |
| D8  | YKL034W                              | TUL1         | RING                  |             |
| D9  | YKR017C                              | HEL1         | RING                  |             |
| D10 | <i>empty</i>                         | <i>empty</i> | <i>empty</i>          |             |
| D11 | YLR032W                              | RAD5         | RING                  |             |
| D12 | YLR097C                              | HRT3         | F box                 |             |
| E1  | YLR148W                              | PEP3/VPS18   | RING                  |             |
| E2  | YLR224W                              | UCC1         | F box                 |             |
| E3  | YLR247C                              | IRC20        | RING                  |             |
| E4  | YLR352W                              | LUG1         | F box                 |             |
| E5  | YLR368W                              | MDM30        | F box                 |             |
| E6  | YLR427W                              | MAG2         | RING                  |             |
| E7  | YML068W                              | ITT1         | RING                  |             |
| E8  | YML088W                              | UFO1         | F box                 |             |
| E9  | YMR026C                              | PEX12        | RING                  |             |
| E10 | YMR119W                              | ASI1         | RING                  |             |
| E11 | YMR231W                              | PEP5/VPS11   | RING                  |             |
| E12 | YMR247C                              | RKR1/LTN1    | RING                  |             |
| F1  | YMR258C                              | ROY1         | F box                 |             |
| F2  | YNL008C                              | ASI3         | RING                  |             |
| F3  | YNL023C                              | FAP1         | RING                  |             |
| F4  | YNL116W                              | DMA2         | RING                  |             |
| F5  | YNL230C                              | ELA1         | F box                 |             |
| F6  | YNL311C                              | SKP2         | F box                 |             |
| F7  | YOL013C                              | HRD1         | RING                  |             |
| F8  | YOL054W                              | PSH1         | RING                  |             |
| F9  | YOL138C                              | RTC1         | RING                  |             |
| F10 | YOR080W                              | DIA2         | F box                 |             |
| F11 | YOR191W                              | ULS1         | RING                  |             |
| F12 | YPR093C                              | ASR1         | RING                  |             |
| G1  | YDR152W                              | GIR2         | RWD domain            |             |
| G2  | YCR059C                              | YIH1         | RWD domain            |             |
| G3  | YDR283C                              | GCN2         | RWD domain            |             |
| G4  | YDR128W                              | MTC5/SEA3    | RWD domain            |             |
| G5  | YDR069C                              | DOA4         | DUB (general effects) | slow growth |
| G6  | YBL058W                              | SHP1/UBX1    | UBX domain            | slow growth |
| G7  | YML013W                              | UBX2         | UBX domain            |             |
| G8  | YDL091C                              | UBX3         | UBX domain            |             |
| G9  | YMR067C                              | UBX4         | UBX domain            |             |
| G10 | YDR330W                              | UBX5         | UBX domain            |             |
| G11 | YJL048C                              | UBX6         | UBX domain            |             |
| G12 | YBR273C                              | UBX7         | UBX domain            |             |
| H1  | YKL213C                              | DOA1         | Ub and Cdc48          |             |
| H2  | YGL058W                              | UBC2         | E2                    |             |
| H3  | YBR082C                              | UBC4         | E2                    |             |
| H4  | YDR059C                              | UBC5         | E2                    |             |
| H5  | dubious strain - supposed to be ubc6 |              |                       |             |
| H6  | YMR022W                              | UBC7         | E2                    |             |
| H7  | YEL012W                              | UBC8         | E2                    |             |

|     |              |              |              |
|-----|--------------|--------------|--------------|
| H8  | YGR133W      | UBC10        | E2           |
| H9  | YOR339C      | UBC11        | E2           |
| H10 | YLR306W      | UBC12        | E2           |
| H11 | YDR092W      | UBC13        | E2           |
| H12 | <i>empty</i> | <i>empty</i> | <i>empty</i> |

**KEY:**

Yellow = known or likely E3s, or parts of E3 complexes.

Pink = RWD domain, a domain with some connection to the UPS

Green = Cdc48-associated factors

Blue = ubiquitin-conjugating enzymes (E2s)

E2 & E3 genes NOT covered by TUS2.0 (gene deletion is inviable, unless noted)

| <u>ORF</u> | <u>NAME</u> | <u>Motif</u>     | <u>Notes</u>           |
|------------|-------------|------------------|------------------------|
| YER125W    | RSP5        | HECT             |                        |
| YLL036C    | PRP19       | U-box            |                        |
| YGL116W    | CDC20       | APC/C activator  |                        |
| YDL008W    | APC11       | RING             | APC/C                  |
| YOL133W    | HRT1        | RING             | RING for SCFs          |
| YDR460W    | TFB3        | RING             |                        |
| YLR323C    | CWC24       | RING             | spliceosome            |
| YDR328C    | SKP1        | SCF Skp1 subunit |                        |
| YDL132W    | CDC53       | Cullin           |                        |
| YFL009W    | CDC4        | F BOX            |                        |
| YIL046W    | MET30       | F BOX            |                        |
| YMR094W    | CTF13       | F BOX            |                        |
| YPL046C    | ELC1        | Elongin C        | the deletion is viable |
| YLR024C    | UBR2        | RING             | entry in library bad   |
| YDR177W    | UBC1        | E2               | *(E2 for APC/C)        |
| YDR054C    | UBC3        | E2               | E2 for SCFs            |
| YER100W    | UBC6        | E2               | the deletion is viable |

\*UBC1 can be deleted in certain strain backgrounds, but was not included in deletion library
